# Supplementary material
Source: Springer Nature journal article supplement (https://www.springermedizin.de/resource/supplementary/12936_2012_2223_MOESM4_ESM.pdf/9542860)

**A**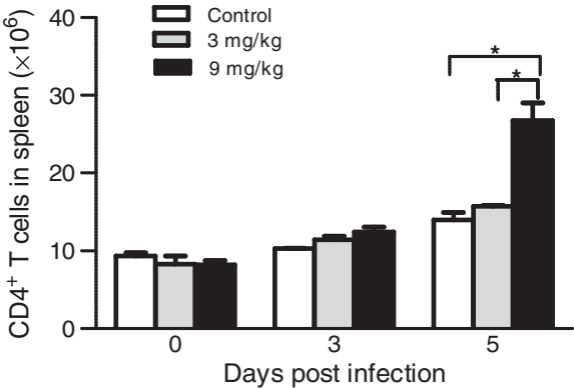**B**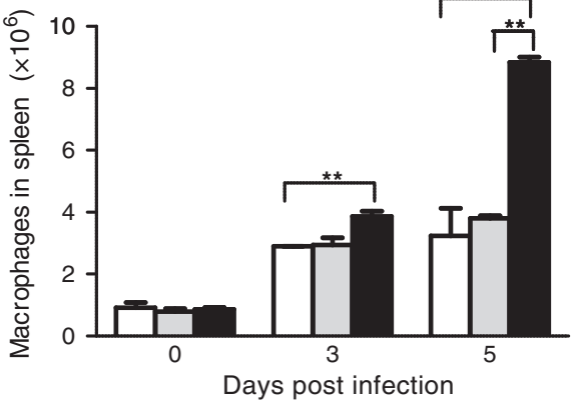

Supplement: MOESM4 [file 9542860]
